# Supplementary material for: Questionnaire validation practice within a theoretical framework: a systematic descriptive literature review of health literacy assessments
Source: PubMed Central journal article supplement — BMJ Open. 2020 Jun 1;10(6):e035974. doi: 10.1136/bmjopen-2019-035974 (PMC7265003; doi:10.1136/bmjopen-2019-035974), 2020-06-01
Supplement: bmjopen-2019-035974supp001.pdf [file bmjopen-2019-035974supp001.pdf]

3/12/2019

Print Search History: EBSCOhost

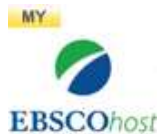

Monday, March 11, 2019 7:57:11 PM

| #   | Query                                                                              | Limiters/Expanders               | Last Run Via                                                                                                        | Results   |
|-----|------------------------------------------------------------------------------------|----------------------------------|---------------------------------------------------------------------------------------------------------------------|-----------|
| S28 | S24 AND S25 AND S26<br>AND S27                                                     | Search modes -<br>Boolean/Phrase | Interface - EBSCOhost<br>Research Databases<br>Search Screen - Advanced<br>Search<br>Database - MEDLINE<br>Complete | 1,036     |
| S27 | S12 OR S13 OR S14 OR<br>S15 OR S16 OR S22 OR<br>S23                                | Search modes -<br>Boolean/Phrase | Interface - EBSCOhost<br>Research Databases<br>Search Screen - Advanced<br>Search<br>Database - MEDLINE<br>Complete | 3,396,491 |
| S26 | S11 OR S21                                                                         | Search modes -<br>Boolean/Phrase | Interface - EBSCOhost<br>Research Databases<br>Search Screen - Advanced<br>Search<br>Database - MEDLINE<br>Complete | 68,560    |
| S25 | S3 OR S4 OR S5 OR S6<br>OR S7 OR S8 OR S9<br>OR S10 OR S18 OR S19<br>OR S20        | Search modes -<br>Boolean/Phrase | Interface - EBSCOhost<br>Research Databases<br>Search Screen - Advanced<br>Search<br>Database - MEDLINE<br>Complete | 5,965,966 |
| S24 | S1 OR S2 OR S17                                                                    | Search modes -<br>Boolean/Phrase | Interface - EBSCOhost<br>Research Databases<br>Search Screen - Advanced<br>Search<br>Database - MEDLINE<br>Complete | 813,727   |
| S23 | (MH "Focus Groups") OR<br>(MH "Interviews as<br>Topic") OR (MH "Data<br>Accuracy") | Search modes -<br>Boolean/Phrase | Interface - EBSCOhost<br>Research Databases<br>Search Screen - Advanced<br>Search<br>Database - MEDLINE<br>Complete | 79,811    |
| S22 | (MH "Psychometrics")                                                               | Search modes -<br>Boolean/Phrase | Interface - EBSCOhost<br>Research Databases<br>Search Screen - Advanced                                             | 69,650    |

<http://web.b.ebscohost.com/ehost/searchhistory/PrintSearchHistory?vid=86&sid=0186532c-f0fc-43b3-964d-c3f33a38b9b3%40pdc-v-sessmgr06&...> 1/4

3/12/2019

Print Search History: EBSCOhost

|     |                                                                                                                 |                                  | Search<br>Database - MEDLINE<br>Complete                                                                                    |         |
|-----|-----------------------------------------------------------------------------------------------------------------|----------------------------------|-----------------------------------------------------------------------------------------------------------------------------|---------|
| S21 | (MH "Health Literacy")<br>OR (MH "Health<br>Education") OR (MH<br>"Consumer Health<br>Information")             | Search modes -<br>Boolean/Phrase | Interface - EBSCOhost<br>Research Databases<br>Search Screen - Advanced<br>Search<br>Database - MEDLINE<br>Complete         | 65,418  |
| S20 | (MH "Self-Assessment")                                                                                          | Search modes -<br>Boolean/Phrase | Interface - EBSCOhost<br>Research Databases<br>Search Screen - Advanced<br>Search<br>Database - MEDLINE<br>Complete         | 11,920  |
| S19 | (MH "Health Surveys")<br>OR (MH "Surveys and<br>Questionnaires") OR<br>(MH "Health Care<br>Surveys")            | Search modes -<br>Boolean/Phrase | Interface - EBSCOhost<br>Research Databases<br>Search Screen - Advanced<br>Search<br>Database - MEDLINE<br>Complete         | 486,718 |
| S18 | (MH "Patient Outcome<br>Assessment") OR (MH<br>"Self Report") OR (MH<br>"Patient Reported<br>Outcome Measures") | Search modes -<br>Boolean/Phrase | Interface - EBSCOhost<br>Research Databases<br>Search Screen - Advanced<br>Search<br>Database - MEDLINE<br>Complete         | 31,421  |
| S17 | (MH "Validation Studies<br>as Topic")                                                                           | Search modes -<br>Boolean/Phrase | Interface - EBSCOhost<br>Research Databases<br>Search Screen - Advanced<br>Search<br>Database - MEDLINE<br>Complete         | 1,977   |
| S16 | TI "focus group*" OR AB<br>"focus group*"                                                                       | Search modes -<br>Boolean/Phrase | Interface - EBSCOhost<br>Research Databases<br>Search Screen - Advanced<br>Search<br>Database - Academic Search<br>Complete | 36,147  |
| S15 | TI "think aloud" OR AB<br>"think aloud"                                                                         | Search modes -<br>Boolean/Phrase | Interface - EBSCOhost<br>Research Databases<br>Search Screen - Advanced<br>Search<br>Database - Academic Search<br>Complete | 1,091   |

<http://web.b.ebscohost.com/ehost/searchhistory/PrintSearchHistory?vid=86&sid=0186532c-f0fc-43b3-964d-c3f33a38b9b3%40pdc-v-sessmgr06&...> 2/4

3/12/2019

Print Search History: EBSCOhost

|     |                                              |                               |                                                                                                                       |           |
|-----|----------------------------------------------|-------------------------------|-----------------------------------------------------------------------------------------------------------------------|-----------|
| S14 | TI interview* OR AB interview*               | Search modes - Boolean/Phrase | Interface - EBSCOhost<br>Research Databases<br>Search Screen - Advanced Search<br>Database - Academic Search Complete | 433,189   |
| S13 | TI Psychometric* OR AB Psychometric*         | Search modes - Boolean/Phrase | Interface - EBSCOhost<br>Research Databases<br>Search Screen - Advanced Search<br>Database - Academic Search Complete | 32,322    |
| S12 | TI measur* OR AB measur*                     | Search modes - Boolean/Phrase | Interface - EBSCOhost<br>Research Databases<br>Search Screen - Advanced Search<br>Database - Academic Search Complete | 2,602,779 |
| S11 | TI "health literacy" OR AB "health literacy" | Search modes - Boolean/Phrase | Interface - EBSCOhost<br>Research Databases<br>Search Screen - Advanced Search<br>Database - Academic Search Complete | 4,293     |
| S10 | TI tool* OR AB tool*                         | Search modes - Boolean/Phrase | Interface - EBSCOhost<br>Research Databases<br>Search Screen - Advanced Search<br>Database - Academic Search Complete | 682,713   |
| S9  | TI test* OR AB test*                         | Search modes - Boolean/Phrase | Interface - EBSCOhost<br>Research Databases<br>Search Screen - Advanced Search<br>Database - Academic Search Complete | 2,261,528 |
| S8  | TI assess* OR AB assess*                     | Search modes - Boolean/Phrase | Interface - EBSCOhost<br>Research Databases<br>Search Screen - Advanced Search<br>Database - Academic Search Complete | 1,782,492 |
| S7  | TI "self rated" OR AB "self rated"           | Search modes - Boolean/Phrase | Interface - EBSCOhost<br>Research Databases<br>Search Screen - Advanced                                               | 7,786     |

<http://web.b.ebscohost.com/ehost/searchhistory/PrintSearchHistory?vid=86&sid=0186532c-f0fc-43b3-964d-c3f33a38b9b3%40pdc-v-sessmgr06&...> 3/4

3/12/2019

Print Search History: EBSCOhost

|    |                                                                          |                                  | Search<br>Database - Academic Search<br>Complete                                                                            |         |
|----|--------------------------------------------------------------------------|----------------------------------|-----------------------------------------------------------------------------------------------------------------------------|---------|
| S6 | TI "self report*" OR AB<br>"self report"                                 | Search modes -<br>Boolean/Phrase | Interface - EBSCOhost<br>Research Databases<br>Search Screen - Advanced<br>Search<br>Database - Academic Search<br>Complete | 92,555  |
| S5 | TI survey* OR AB<br>survey*                                              | Search modes -<br>Boolean/Phrase | Interface - EBSCOhost<br>Research Databases<br>Search Screen - Advanced<br>Search<br>Database - Academic Search<br>Complete | 590,730 |
| S4 | TI questionnaire* OR AB<br>questionnaire*                                | Search modes -<br>Boolean/Phrase | Interface - EBSCOhost<br>Research Databases<br>Search Screen - Advanced<br>Search<br>Database - Academic Search<br>Complete | 287,547 |
| S3 | TI "patient reported<br>outcome*" OR AB<br>"patient reported<br>outcome" | Search modes -<br>Boolean/Phrase | Interface - EBSCOhost<br>Research Databases<br>Search Screen - Advanced<br>Search<br>Database - Academic Search<br>Complete | 7,191   |
| S2 | TI Verif* OR AB Verif*                                                   | Search modes -<br>Boolean/Phrase | Interface - EBSCOhost<br>Research Databases<br>Search Screen - Advanced<br>Search<br>Database - Academic Search<br>Complete | 276,503 |
| S1 | TI valid* OR AB valid*                                                   | Search modes -<br>Boolean/Phrase | Interface - EBSCOhost<br>Research Databases<br>Search Screen - Advanced<br>Search<br>Database - Academic Search<br>Complete | 639,560 |
