# Supplementary material for: Questionnaire validation practice within a theoretical framework: a systematic descriptive literature review of health literacy assessments
Source: PubMed Central journal article supplement — BMJ Open. 2020 Jun 1;10(6):e035974. doi: 10.1136/bmjopen-2019-035974 (PMC7265003; doi:10.1136/bmjopen-2019-035974), 2020-06-01
Supplement: bmjopen-2019-035974supp003.pdf [file bmjopen-2019-035974supp003.pdf]

**Supplementary file 3: Data extraction framework**

Note: The table has been sorted to highlight the studies that directly and indirectly referenced a validity-testing framework - see Column 2

| Author                | Reference to validity testing framework                            | Country   | HL assessment/s under investigation                                          | Comparator HL assessment/s | Reliability                             | Test content | Response processes | Internal structure | Relations to other variables | Validity and the consequences of testing |
|-----------------------|--------------------------------------------------------------------|-----------|------------------------------------------------------------------------------|----------------------------|-----------------------------------------|--------------|--------------------|--------------------|------------------------------|------------------------------------------|
| Dykhuis et al (2019)  | Direct to Francis et al (2016) checklist [1]                       | USA       | Test BMNT                                                                    | REALM-R, REALM-SF          | Cronbach's alpha                        | 1            | x                  | x                  | 2                            | x                                        |
| Elsworth et al (2016) | Direct to Messick 1992 In Alkin MC [2]                             | Australia | Test HLQ                                                                     | x                          | Cronbach's alpha, Composite reliability | x            | x                  | 2                  | 2                            | x                                        |
| Hawkins et al (2017)  | Direct ref to <i>Standards</i> 2014, Kane 1992, Messick 1993 [3-5] | Australia | Test HLQ                                                                     | x                          | Inter-rater                             | 1            | 2                  | x                  | x                            | x                                        |
| Begoray (2012)        | Indirect to <i>Standards</i> [6]                                   | Canada    | Develop and test health literacy assessment (no name) (9 s-r items, 2 Cloze) | REALM                      | Cronbach's alpha                        | 1            | x                  | x                  | 2                            | x                                        |

Authors: Hawkins M; Elsworth GR; Hoban E; Osborne RH. (2019)

| Author                | Reference to validity testing framework | Country   | HL assessment/s under investigation | Comparator HL assessment/s            | Reliability                          | Test content | Response processes | Internal structure | Relations to other variables | Validity and the consequences of testing |
|-----------------------|-----------------------------------------|-----------|-------------------------------------|---------------------------------------|--------------------------------------|--------------|--------------------|--------------------|------------------------------|------------------------------------------|
| DeBello (2016) thesis | Indirect to <i>Standards</i> [7]        | USA       | Test HKACS                          | x                                     | Cronbach's alpha;<br>Test-retest     | 2            | x                  | 1                  | 4                            | x                                        |
| Elder et al (2012)    | Indirect to <i>Standards</i> [8, 9]     | Australia | Test REALM (13 items)               | TOFHLA, NVS, Definition scores / AQOL | Cronbach's alpha;<br>Inter-rater     | 3            | x                  | x                  | 4                            | 1                                        |
| Goodwin et al (2018)  | Indirect to <i>Standards</i> [10, 11]   | Australia | HLQ                                 | x                                     | Cronbach's alpha                     | x            | x                  | 1                  | 1                            | x                                        |
| Morris et al (2017)   | Indirectly to <i>Standards</i> [12]     | Australia | Test HLQ                            | x                                     | Person separation index (PSI) in IRT | x            | x                  | 3                  | x                            | x                                        |
| Osborne et al (2013)  | Indirectly to <i>Standards</i> [10]     | Australia | Develop and test HLQ                | x                                     | Composite reliability                | 7            | 1                  | 3                  | 1                            | x                                        |

Authors: Hawkins M; Elsworth GR; Hoban E; Osborne RH. (2019)

| Author                 | Reference to validity testing framework | Country   | HL assessment/s under investigation    | Comparator HL assessment/s                                                         | Reliability                               | Test content | Response processes | Internal structure | Relations to other variables | Validity and the consequences of testing |
|------------------------|-----------------------------------------|-----------|----------------------------------------|------------------------------------------------------------------------------------|-------------------------------------------|--------------|--------------------|--------------------|------------------------------|------------------------------------------|
| Baker et al (1999)     | x                                       | USA       | Develop and test S-TOFHLA              | REALM                                                                              | Cronbach's alpha                          | 1            | x                  | x                  | 1                            | x                                        |
| Bann et al (2012)      | x                                       | USA       | Develop and test HLSI-SF               | S-TOFHLA, self-report questions                                                    | Cronbach's alpha                          | 3            | x                  | 2                  | 1                            | x                                        |
| Barber et al (2009)    | x                                       | Australia | Test REALM, TOFHLA, NVS                | AQOL                                                                               | x                                         | x            | x                  | x                  | 3                            | x                                        |
| Cavanaugh et al (2015) | x                                       | USA       | Test BHLS (3 items)                    | REALM, S-TOFHLA, MMSE / CHeKS, PiKS                                                | Cronbach's alpha                          | x            | x                  | x                  | 6                            | x                                        |
| Chesser et al (2014)   | x                                       | USA       | Test S-TOFHLA                          | x                                                                                  | x                                         | 1            | 1                  | x                  | x                            | x                                        |
| Chew et al 2004        | x                                       | USA       | Develop and test 3 screening questions | S-TOFHLA                                                                           | x                                         | 2            | x                  | x                  | 1                            | x                                        |
| Chew et al 2008        | x                                       | USA       | Test 3 screening questions             | S-TOFHLA, REALM                                                                    | x                                         | x            | x                  | x                  | 1                            | x                                        |
| Curtis et al (2015)    | x                                       | USA       | Develop and test CHAS                  | S-TOFHLA, REALM, NVS, MMSE / self-reported health status, SF-36, PROMIS short form | Cronbach's alpha; IRT TIF; Omega analysis | 2            | x                  | 3                  | 6                            | x                                        |

Authors: Hawkins M; Elsworth GR; Hoban E; Osborne RH. (2019)

| Author                  | Reference to validity testing framework | Country | HL assessment/s under investigation                         | Comparator HL assessment/s                                      | Reliability                                 | Test content | Response processes | Internal structure | Relations to other variables | Validity and the consequences of testing |
|-------------------------|-----------------------------------------|---------|-------------------------------------------------------------|-----------------------------------------------------------------|---------------------------------------------|--------------|--------------------|--------------------|------------------------------|------------------------------------------|
|                         |                                         |         |                                                             | emotional health                                                |                                             |              |                    |                    |                              |                                          |
| Dageforde et al (2015)  | x                                       | USA     | Test SLS (3 items)                                          | REALM, S-TOFHLA                                                 | Cronbach's alpha; Wilcoxon signed rank test | 1            | x                  | x                  | 2                            | x                                        |
| Davis et al (1991)      | x                                       | USA     | Test REALM                                                  | PIAT-R, SORT                                                    | Test-retest; Inter-rater                    | 1            | x                  | x                  | 1                            | x                                        |
| Davis et al (1993)      | x                                       | USA     | Develop and test REALM-SF                                   | PIAT-R, SORT-R, WRAT-R                                          | x                                           | 1            | x                  | x                  | 1                            | x                                        |
| Driessnack et al (2014) | x                                       | USA     | Test NVS                                                    | N of children's books                                           | Cronbach's alpha                            | x            | x                  | x                  | 3                            | x                                        |
| Goodman et al (2015)    | x                                       | USA     | Test BHLS (3 items)                                         | REALM-R, NVS                                                    | x                                           | x            | x                  | x                  | 1                            | x                                        |
| Hadden (2012) thesis    | x                                       | USA     | Test HLSI-SF                                                | S-TOFHLA, Perceptions of Difficulty with Health Literacy Skills | x                                           | x            | x                  | x                  | 5                            | x                                        |
| Harper (2013) thesis    | x                                       | USA     | Develop and test a new health literacy assessment [no name] | S-TOFHLA                                                        | Cronbach's alpha                            | 4            | x                  | 2                  | 3                            | x                                        |

Authors: Hawkins M; Elsworth GR; Hoban E; Osborne RH. (2019)

| Author                  | Reference to validity testing framework | Country   | HL assessment/s under investigation   | Comparator HL assessment/s      | Reliability                   | Test content | Response processes | Internal structure | Relations to other variables | Validity and the consequences of testing |
|-------------------------|-----------------------------------------|-----------|---------------------------------------|---------------------------------|-------------------------------|--------------|--------------------|--------------------|------------------------------|------------------------------------------|
| Haun (2012)             | x                                       | USA       | Test S-TOFHLA, REALM, BRIEF (4 items) | x                               | Cronbach's alpha              | x            | x                  | 1                  | 4                            | x                                        |
| Haun (2007) thesis      | x                                       | USA       | Test BRIEF (4 items)                  | S-TOFHLA and REALM              | Cronbach's alpha              | x            | x                  | x                  | 3                            | x                                        |
| Housten et al (2018)    | x                                       | USA       | Test S-TOFHLA                         | SNS, GL (GL1, GL2, GL3)         | x                             | x            | x                  | x                  | 1                            | x                                        |
| Jordan et al (2013)     | x                                       | Australia | Develop and test HeLMS                | x                               | Cronbach's alpha; Test-retest | 3            | 1                  | 3                  | 2                            | x                                        |
| Kirk et al (2012)       | x                                       | USA       | Test REALM-SF, NVS                    | S-TOFHLA                        | x                             | x            | x                  | x                  | 2                            | x                                        |
| Ko et al (2012)         | x                                       | Singapore | Develop and test HLTS                 | NVS                             | Cronbach's alpha              | x            | x                  | x                  | 4                            | x                                        |
| Kordovski et al (2017)  | x                                       | USA       | Test NVS                              | REALM, SILS                     | Cronbach's alpha              | x            | x                  | x                  | 7                            | x                                        |
| McCormack et al (2010)  | x                                       | USA       | Develop and test HLSI                 | S-TOFHLA, self-report questions | Cronbach's alpha              | 3            | x                  | 2                  | 3                            | x                                        |
| McNaughton et al (2011) | x                                       | USA       | Test SLS (3 items) and SNS (8 items)  | S-TOFHLA, REALM, WRAT4          | Cronbach's alpha              | x            | x                  | x                  | 3                            | x                                        |
| Miller (2018) thesis    | x                                       | USA       | Test HLSI (Cloze only), NVS, S-TOFHLA | x                               | Cronbach's alpha              | x            | x                  | 1                  | 1                            | x                                        |

Authors: Hawkins M; Elsworth GR; Hoban E; Osborne RH. (2019)

| Author                    | Reference to validity testing framework | Country     | HL assessment/s under investigation                      | Comparator HL assessment/s | Reliability                                | Test content | Response processes | Internal structure | Relations to other variables | Validity and the consequences of testing |
|---------------------------|-----------------------------------------|-------------|----------------------------------------------------------|----------------------------|--------------------------------------------|--------------|--------------------|--------------------|------------------------------|------------------------------------------|
| Morris et al (2006)       | x                                       | USA         | Test SILS 1                                              | S-TOFHLA                   | x                                          | x            | x                  | x                  | 1                            | x                                        |
| Parker et al (1995)       | x                                       | USA         | Develop and test TOFHLA                                  | WRAT-R, REALM              | Cronbach's alpha; Split halves coefficient | 1            | x                  | x                  | 1                            | x                                        |
| Quinlan et al (2015)      | x                                       | USA         | test SILS 1 and SILS 2                                   | REALM and S-TOFHLA         | x                                          | x            | x                  | x                  | 1                            | x                                        |
| Rawson et al (2010)       | x                                       | USA         | Develop and test METER                                   | REALM                      | Cronbach's alpha                           | x            | x                  | x                  | 2                            | x                                        |
| Sand-Jecklin et al (2014) | x                                       | USA         | Develop and test BHLS (5 items)                          | S-TOFHLA                   | Cronbach's alpha                           | x            | x                  | 2                  | 4                            | x                                        |
| Shaw et al (2014)         | x                                       | USA         | Develop and test remote admin health literacy assessment | S-TOFHLA                   | x                                          | 1            | x                  | x                  | 1                            | x                                        |
| Soelberg (2015)           | x                                       | USA         | Test NVS                                                 | S-TOFHLA                   | Cronbach's alpha                           | x            | x                  | x                  | 2                            | x                                        |
| Sørensen et al (2013)     | x                                       | Netherlands | Develop and test HLS-EU-Q                                | x                          | Cronbach's alpha                           | 7            | 1                  | 1                  | x                            | x                                        |
| Wallace et al (2006)      | x                                       | USA         | Test 3 screening questions                               | REALM                      | x                                          | x            | x                  | x                  | 2                            | x                                        |
| Wallston et al (2014)     | x                                       | USA         | Test BHLS (3 items)                                      | S-TOFHLA                   | Cronbach's alpha; Inter-rater              | x            | x                  | x                  | 4                            | x                                        |

Authors: Hawkins M; Elsworth GR; Hoban E; Osborne RH. (2019)

| Author             | Reference to validity testing framework | Country   | HL assessment/s under investigation | Comparator HL assessment/s | Reliability                   | Test content | Response processes | Internal structure | Relations to other variables | Validity and the consequences of testing |
|--------------------|-----------------------------------------|-----------|-------------------------------------|----------------------------|-------------------------------|--------------|--------------------|--------------------|------------------------------|------------------------------------------|
| Weiss et al (2005) | x                                       | USA       | Develop and test NVS                | TOFHLA                     | Cronbach's alpha              | 3            | x                  | x                  | 3                            | x                                        |
| Zhang et al (2009) | x                                       | Singapore | Develop and test FHLT (21 items)    | REALM                      | Cronbach's alpha; Test-retest | 3            | 1                  | 1                  | 5                            | x                                        |
| <b>Totals</b>      |                                         |           |                                     |                            |                               | <b>52</b>    | <b>7</b>           | <b>28</b>          | <b>107</b>                   | <b>1</b>                                 |

Authors: Hawkins M; Elsworth GR; Hoban E; Osborne RH. (2019)

## References

1. Francis, D.O., et al., *Checklist to operationalize measurement characteristics of patient-reported outcome measures*. Systematic Reviews, 2016. **5**(1): p. 129.
2. Alkin, M.C., *Encyclopedia of educational research*. Vol. 3. 1992: Macmillan.
3. AERA, APA, and NCME, *Standards for educational and psychological testing*. 2014, Washington, DC: American Educational Research Association.
4. Kane, M.T., *An argument-based approach to validity*. Psychological Bulletin, 1992. **112**(3): p. 527-535.
5. Messick, S., *Foundations of validity: Meaning and consequences in psychological assessment*. ETS Research Report Series, 1993. **1993**(2): p. i-18.
6. Hubley, A.M. and B.D. Zumbo, *A dialectic on validity: Where we have been and where we are going*. The Journal of General Psychology, 1996. **123**(3): p. 207-215.
7. Waltz, C.F., O.L. Strickland, and E.R. Lenz, *Measurement in nursing and health research*. 2010: Springer publishing company.
8. Abedi, J., C.H. Hofstetter, and C. Lord, *Assessment accommodations for English language learners: Implications for policy-based empirical research*. Review of Educational Research, 2004. **74**(1): p. 1-28.
9. LaCelle-Peterson, M.W. and C. Rivera, *Is it real for all kids? A framework for equitable assessment policies for English language learners*. Harvard Educational Review, 1994. **64**(1): p. 55.
10. Buchbinder, R., et al., *A validity-driven approach to the understanding of the personal and societal burden of low back pain: development of a conceptual and measurement model*. Arthritis Research & Therapy, 2011. **13**(5): p. R152.
11. Hawkins, M., G.R. Elsworth, and R.H. Osborne, *Application of validity theory and methodology to patient-reported outcome measures (PROMs): building an argument for validity*. Quality of Life Research, 2018. **27**(7): p. 1695-1710.
12. Hawkins, M., et al., *The Health Literacy Questionnaire (HLQ) at the patient-clinician interface: a qualitative study of what patients and clinicians mean by their HLQ scores*. BMC Health Services Research, 2017. **17**(1): p. 309.

Authors: Hawkins M; Elsworth GR; Hoban E; Osborne RH. (2019)
