# Supplementary material for: Questionnaire validation practice within a theoretical framework: a systematic descriptive literature review of health literacy assessments
Source: PubMed Central journal article supplement — BMJ Open. 2020 Jun 1;10(6):e035974. doi: 10.1136/bmjopen-2019-035974 (PMC7265003; doi:10.1136/bmjopen-2019-035974), 2020-06-01
Supplement: bmjopen-2019-035974supp005.pdf [file bmjopen-2019-035974supp005.pdf]

## Supplementary file 5 – Supplementary Tables 1 to 4

Supplementary Table 1. Evidence based on test content

| <b>Number of instances of evidence based on test content across all studies</b> |           |             |
|---------------------------------------------------------------------------------|-----------|-------------|
| <i>Method to generate evidence</i>                                              |           |             |
| Literature review                                                               | 4         | 8%          |
| Existing measures of the construct                                              | 8         | 15%         |
| Expert review                                                                   | 14        | 27%         |
| Participant involvement:                                                        |           |             |
| Concept mapping                                                                 | 3         | 6%          |
| Interviews                                                                      | 2         | 4%          |
| Participant feedback processes about items                                      | 4         | 8%          |
| Construct descriptions (e.g., high/low)                                         | 4         | 8%          |
| Item intent descriptions                                                        | 1         | 2%          |
| Examination of administration methods                                           | 3         | 6%          |
| Other method (e.g., item difficulty):                                           |           |             |
| Item difficulty                                                                 | 5         | 10%         |
| Items tested against item intents                                               | 1         | 2%          |
| IRT analysis for item selection within domains                                  | 1         | 2%          |
| Item selection based on hospital medical texts                                  | 1         | 2%          |
| Item selection based on HL conceptual model                                     | 1         | 2%          |
| <i>Total instances of evidence based on test content</i>                        | <i>52</i> | <i>100%</i> |

Supplementary Table 2. Evidence based on response processes

| <b>Number of instances of evidence based on response processes across all studies</b> |          |             |
|---------------------------------------------------------------------------------------|----------|-------------|
| <i>Method to generate evidence</i>                                                    |          |             |
| With respondents:                                                                     |          |             |
| Cognitive interviews                                                                  | 3        | 43%         |
| Recording and timing responses to items                                               | 3        | 43%         |
| With users:                                                                           |          |             |
| Cognitive interviews                                                                  | 1        | 14%         |
| <i>Total instances of evidence based on response processes</i>                        | <i>7</i> | <i>100%</i> |

Supplementary Table 3. Evidence based on internal structure

| <b>Number of instances of evidence based on internal structure across all studies</b> |   |     |
|---------------------------------------------------------------------------------------|---|-----|
| <i>Method to generate evidence</i>                                                    |   |     |
| Exploratory factor analysis (incl. PCA*)                                              | 7 | 25% |
| Confirmatory factory analysis (incl. IRT** item discriminations)                      | 7 | 25% |
| Multi-group factor analysis                                                           | 1 | 4%  |
| Correlation patterns / multi-trait scaling analysis:                                  |   |     |
| Tetrachoric correlations                                                              | 1 | 4%  |

Authors: Hawkins M; Elsworth GR; Hoban E; Osborne RH. (2019)

|                                                                |    |      |
|----------------------------------------------------------------|----|------|
| Inter-item correlations                                        | 1  | 4%   |
| Item-total correlations                                        | 1  | 4%   |
| Item-remainder correlations                                    | 2  | 7%   |
| Differential item functioning                                  | 3  | 11%  |
| Other method:                                                  |    |      |
| Very Simple Structure                                          | 1  | 4%   |
| Velicer's Minimum Average partial criterion                    | 1  | 4%   |
| Rasch analysis (overall fit, individual person/item fit)       | 1  | 4%   |
| Intra-factor correlations                                      | 1  | 4%   |
| IRT for item discriminations                                   | 1  | 4%   |
| <i>Total instances of evidence based on response processes</i> | 28 | 100% |

\*PCA = principal component analysis; \*\*IRT = item response theory

Supplementary Table 4. Evidence based on relations to other variables

| <b>Summary of number of instances of evidence based on relations to other variables across all studies</b>                  |     |      |
|-----------------------------------------------------------------------------------------------------------------------------|-----|------|
| <i>Type of evidence</i>                                                                                                     |     |      |
| Convergent evidence                                                                                                         | 57  | 53%  |
| Discriminant evidence                                                                                                       | 3   | 3%   |
| Criterion-referenced evidence                                                                                               | 17  | 16%  |
| Evidence for group differences                                                                                              | 30  | 28%  |
| Evidence for generalisation                                                                                                 | 0   | 0%   |
| <i>Total instances of evidence based on relations to other variables</i>                                                    | 107 | 100% |
| <b>Number of instances of evidence based on relations to other variables across all studies</b>                             |     |      |
| <b><i>Convergent evidence</i></b> (relationships between items and scales of the same or similar structure) (n=38 studies): |     |      |
| Spearman's correlation coefficient                                                                                          | 11  | 19%  |
| Pearson correlation coefficient                                                                                             | 11  | 19%  |
| Linear regression models                                                                                                    | 5   | 9%   |
| Logistic regression models                                                                                                  | 2   | 4%   |
| Receiver operating characteristic / Area under the ROC (AUROC)                                                              | 11  | 19%  |
| Wilcoxon signed rank test                                                                                                   | 2   | 4%   |
| Cross tabulations / calculated agreement and disagreement                                                                   | 2   | 4%   |
| Goodman-Kruskal gamma correlation                                                                                           | 1   | 2%   |
| Bland-Altman plots                                                                                                          | 1   | 2%   |
| Cohen's Kappa                                                                                                               | 1   | 2%   |
| Sensitivity and specificity                                                                                                 | 1   | 2%   |
| Stratum-specific likelihood ratios                                                                                          | 1   | 2%   |
| Unnamed / unclear correlation calculations with similar measures                                                            | 8   | 14%  |
| <i>Total instances of convergent evidence</i>                                                                               | 57  | 100% |
| <b><i>Discriminant evidence</i></b> (measures of different constructs are sufficiently uncorrelated) (n=2 studies)          |     |      |
| Comparison of AVE and shared variance between HLQ scales                                                                    | 1   | 33%  |
| Pearson correlation coefficient                                                                                             | 1   | 33%  |
| Multiscale factor analysis                                                                                                  | 1   | 33%  |
| <i>Total instances of discriminant evidence</i>                                                                             | 3   | 100% |

Authors: Hawkins M; Elsworth GR; Hoban E; Osborne RH. (2019)

|                                                                                                                                                      |          |          |
|------------------------------------------------------------------------------------------------------------------------------------------------------|----------|----------|
| <b>Criterion-referenced evidence</b> (how accurately test scores predict criterion performance) (n=9 studies):                                       |          |          |
| Spearman's correlation coefficient                                                                                                                   | 2        | 12%      |
| Pearson correlation coefficient                                                                                                                      | 1        | 6%       |
| Linear regression models                                                                                                                             | 6        | 35%      |
| Logistic regression models                                                                                                                           | 2        | 12%      |
| ROC/AUROC                                                                                                                                            | 1        | 6%       |
| Chi-squared test of independence                                                                                                                     | 3        | 18%      |
| ANOVA                                                                                                                                                | 1        | 6%       |
| Cohen's d                                                                                                                                            | 1        | 6%       |
| <i>Total instances of criterion-referenced evidence</i>                                                                                              | 17       | 100%     |
| <b>Evidence for group differences</b> (relationships of test scores with background characteristics such as demographic information) (n=19 studies): | <b>N</b> | <b>%</b> |
| Linear regression models                                                                                                                             | 4        | 13%      |
| Logistic regression models                                                                                                                           | 3        | 10%      |
| Univariate associations                                                                                                                              | 1        | 3%       |
| Spearman's correlation coefficient                                                                                                                   | 1        | 3%       |
| Chi-squared test                                                                                                                                     | 3        | 10%      |
| Analysis of variance (ANOVA)                                                                                                                         | 5        | 17%      |
| Analysis of covariance (ANCOVA)                                                                                                                      | 1        | 3%       |
| Cross tabulations                                                                                                                                    | 1        | 3%       |
| Area under the ROC (AUROC)                                                                                                                           | 1        | 3%       |
| Kruskal-Wallis test                                                                                                                                  | 1        | 3%       |
| Mann-Whitney U test                                                                                                                                  | 2        | 7%       |
| Goodman-Kruskal gamma correlation                                                                                                                    | 1        | 3%       |
| Independent sample t-test                                                                                                                            | 3        | 10%      |
| Exploratory partial correlation analysis                                                                                                             | 1        | 3%       |
| Bayesian fit statistics                                                                                                                              | 1        | 3%       |
| Descriptive statistics (sub-group differences)                                                                                                       | 1        | 3%       |
| <i>Total instances of evidence of group differences</i>                                                                                              | 30       | 100%     |
| <b>Evidence for generalisation</b> (degree to which evidence can be generalised to a new situation) (n=0 studies):                                   | <b>N</b> | <b>%</b> |
| Only research synthesis-type studies - see validity generalisation in the <i>Standards</i> .                                                         | 0        | 0%       |

Authors: Hawkins M; Elsworth GR; Hoban E; Osborne RH. (2019)
